# Supplementary material
Source: PubMed Central journal article supplement (PMC2637780)

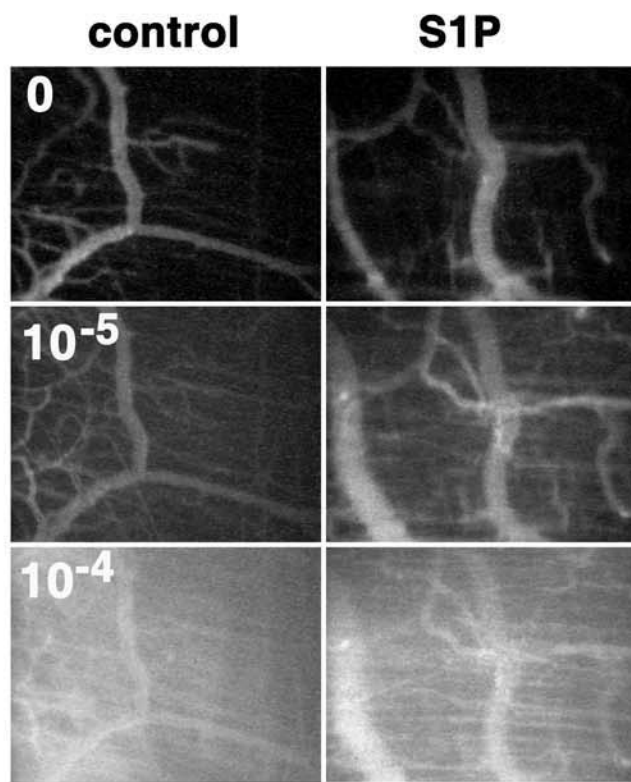

Lee et al., Supplementary Figure 1

Supplement: 00097.2008_1.pdf [file 00097.2008_1.pdf]

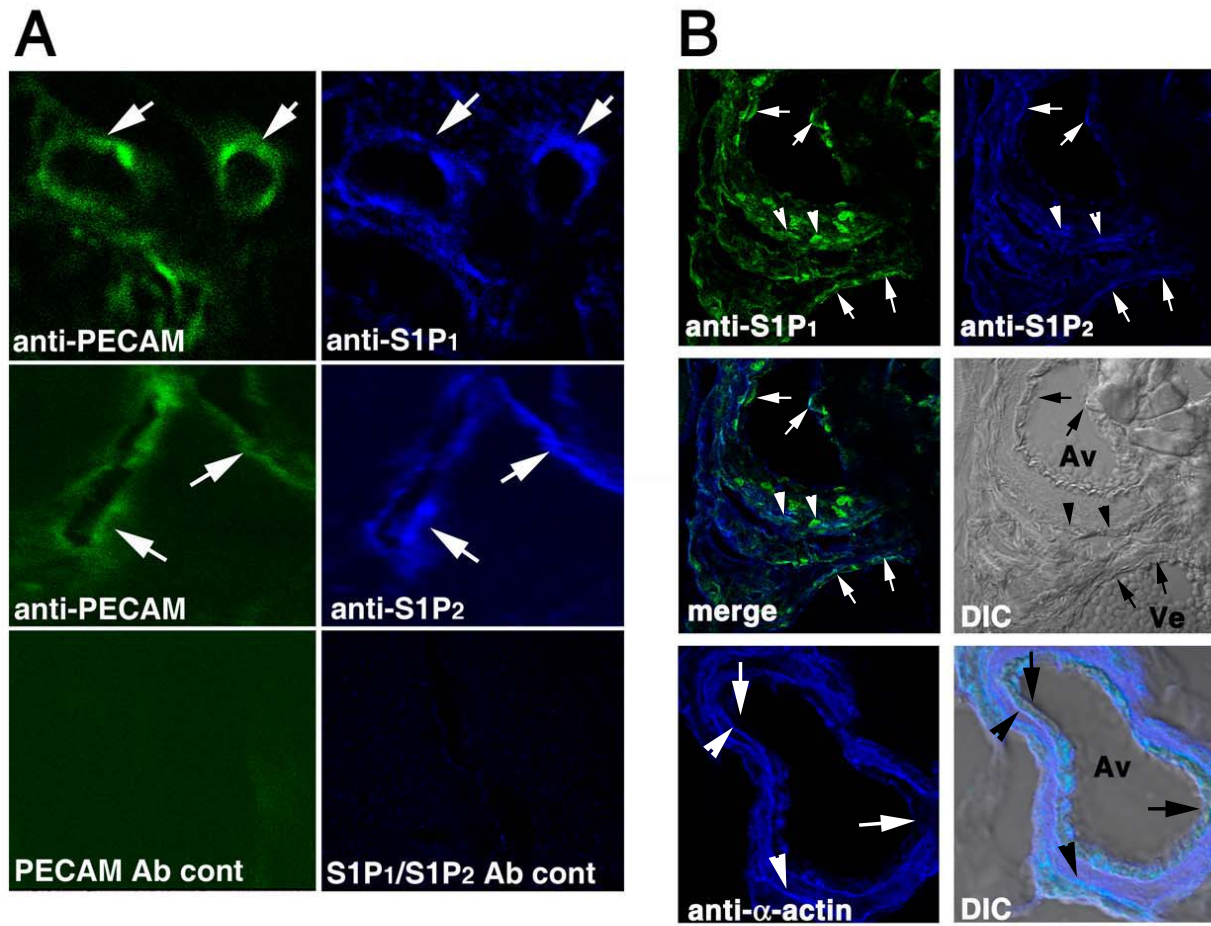

Lee et al., Supplemental Figure 2

Supplement: 00097.2008_2.pdf [file 00097.2008_2.pdf]

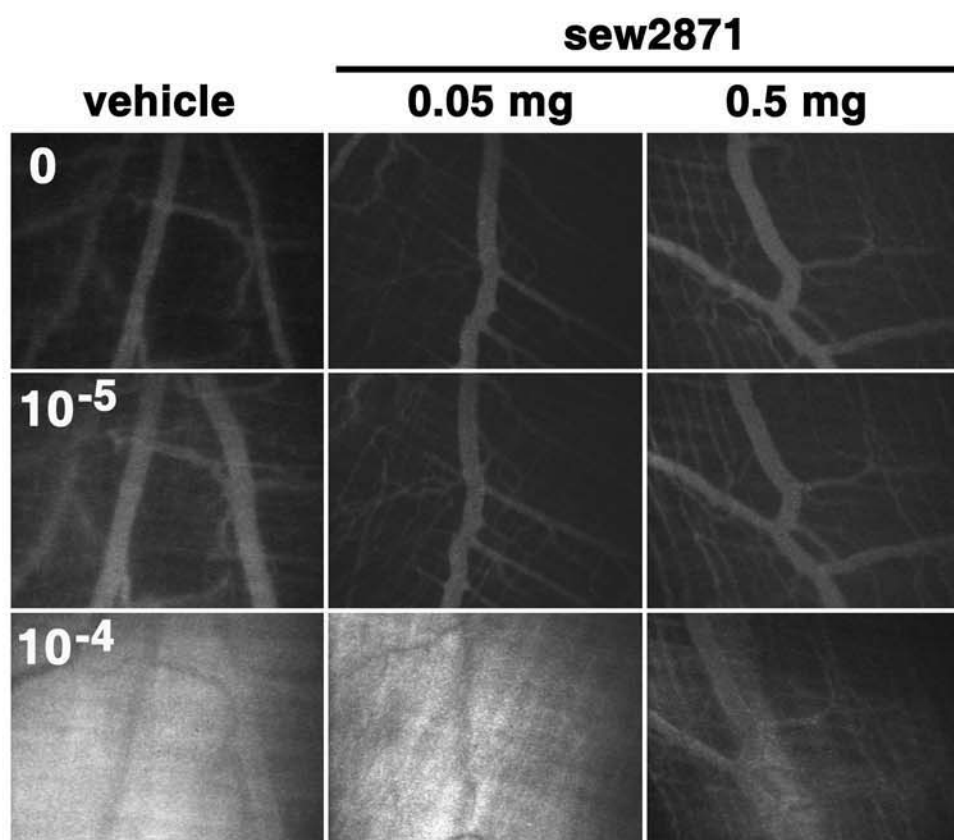

Lee et al., Supplementary Figure 3

Supplement: 00097.2008_3.pdf [file 00097.2008_3.pdf]

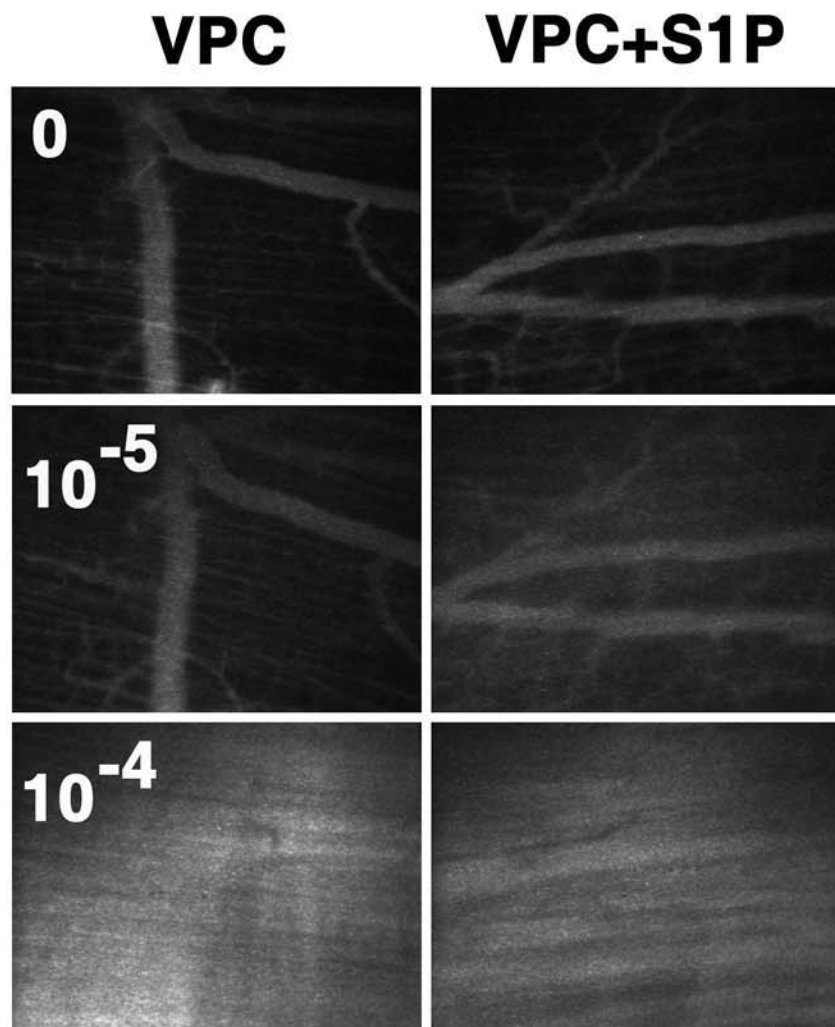

Lee et al., Supplementary Figure 4

Supplement: 00097.2008_4.pdf [file 00097.2008_4.pdf]

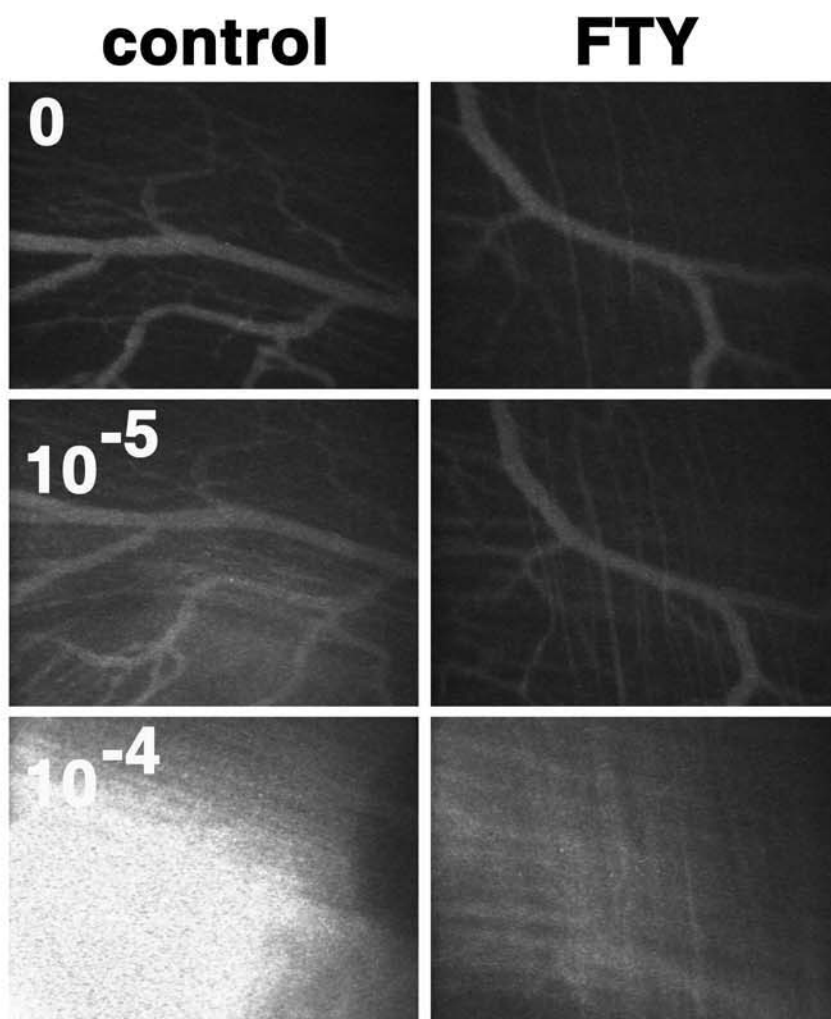

Lee et al., Supplementary Figure 5

Supplement: 00097.2008_5.pdf [file 00097.2008_5.pdf]

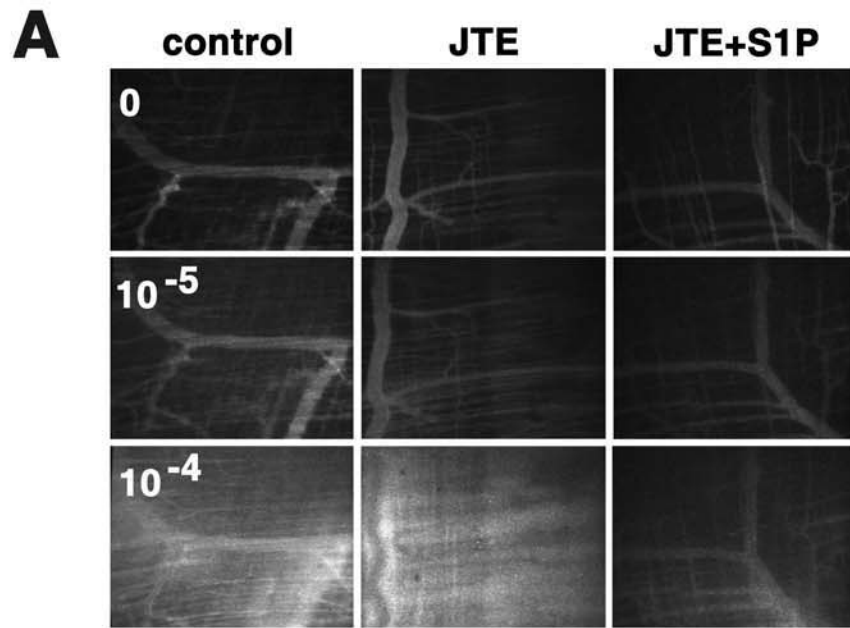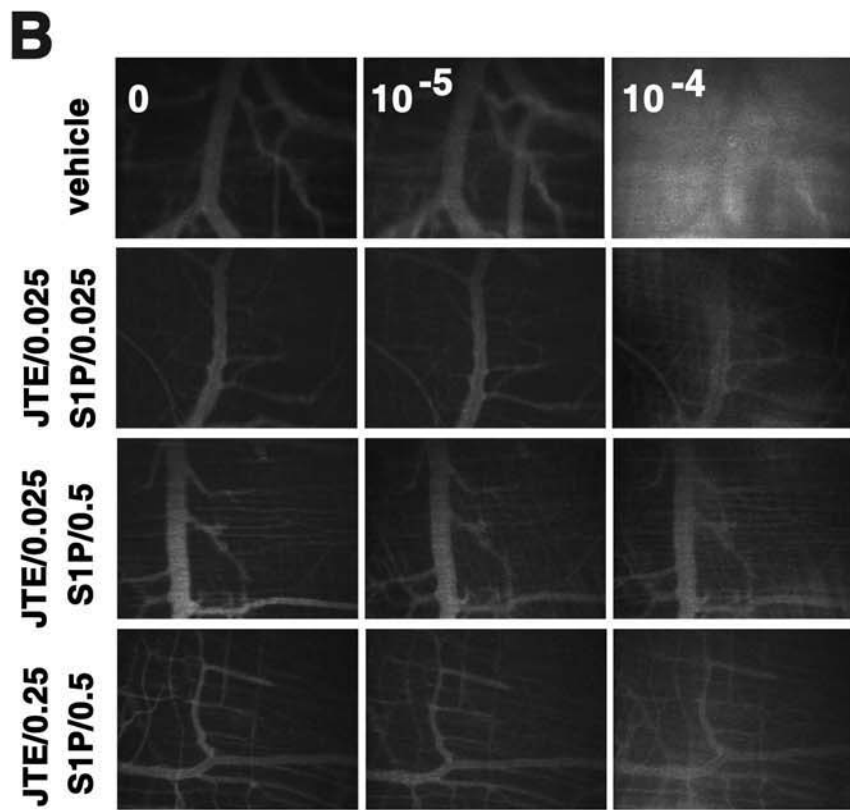

Lee et al., Supplementary Figure 6

Supplement: 00097.2008_6.pdf [file 00097.2008_6.pdf]
